# Supplementary material
Source: ML conference proceedings conference paper supplement (https://proceedings.neurips.cc/paper_files/paper/2022/hash/8ec88961d36d9a87ac24baf45402744f-Abstract.html)
Supplement: Supplementary file 1 [file 8ec88961d36d9a87ac24baf45402744f-Supplemental-Conference.zip]

Archive with 1 entries (1 files):
- mc-camera-ready-supp.pdf
